# 1 CDeep3M-Preview: Online segmentation 2 using the deep neural network model zoo

3  
4 **Authors: Matthias G Haberl<sup>1</sup>, Willy Wong<sup>1</sup>, Sean Penticoff<sup>1</sup>, Jihyeon Je<sup>1</sup>,  
5 Matthew Madany<sup>1</sup>, Adrian Borchardt<sup>1</sup>, Daniela Boassa<sup>1</sup>, Steven T Peltier<sup>1</sup>, Mark  
6 H Ellisman<sup>1</sup>**

7  
8 <sup>1</sup> National Center for Microscopy and Imaging Research, School of Medicine, University of  
9 California San Diego, Biomedical Science Building, 9500 Gilman Drive, La Jolla

## 10 11 12 **Abstract**

13  
14 Sharing deep neural networks and testing the performance of trained networks  
15 typically involves a major initial commitment towards one algorithm, before knowing  
16 how the network will perform on a different dataset. Here we release a free online tool,  
17 CDeep3M-Preview, that allows end-users to rapidly test the performance of any of the  
18 pre-trained neural network models hosted on the CIL-CDeep3M modelzoo. This  
19 feature makes part of a set of complementary strategies we employ to facilitate  
20 sharing, increase reproducibility and enable quicker insights into biology. Namely we:  
21 (1) provide CDeep3M deep learning image segmentation software through cloud  
22 applications (Colab and AWS) and containerized installations (Docker and Singularity)  
23 (2) co-hosting trained deep neural networks with the relevant microscopy images and  
24 (3) providing a CDeep3M-Preview feature, enabling quick tests of trained networks on  
25 user provided test data or any of the publicly hosted large datasets. The CDeep3M-  
26 modelzoo and the [cellimagelibrary.org](http://cellimagelibrary.org) are open for contributions of both, trained  
27 models as well as image datasets by the community and all services are free of charge.

## 28 **Main**

29 New deep neural networks are developed rapidly and a startling number of trained  
30 models are available online for a wide range of image enhancement and analysis tasks  
31 (see <sup>1</sup> for a recent review). Since training new models is however expensive and  
32 typically requires laboriously expert annotated training data, innovations in sharing  
33 trained models effectively are critical to reduce time and cost in research. Model zoos  
34 and GitHub repositories with different networks and/or trained models are currently the  
35 most common way to share models, but are fairly disparate from the typical workflow  
36 or processing pipelines of biomedical labs. Passively hosted model zoos do not offer  
37 an immediate entry point to evaluate the performance of a neural network or a trained  
38 model, instead require to go first through complex installations - usually on high  
39 performance systems - before being able to know if the network will be useful for the  
40 specific question at hand. The computations to test a deep neural network typically  
41 require installation of several requisites on a high-performance GPU-equipped system  
42 and familiarization with the individual processing routines and configurations  
43 employed. Therefore, the use of model zoos has not been able to eliminate a major  
44 time commitment required to reproduce results. Even recent developments of more  
45 user-friendly solutions for running deep neural networks for image segmentation<sup>2-4</sup> on  
46 local or cloud resources do require a time commitment of researchers at different levels  
47 to: set up, configure and troubleshoot then familiarize themselves with software  
48 settings and testing parameters and their influence on performance. Further training  
49 and testing different models on several small or individual very large imaging datasets  
50 can be cumbersome. As a result, many cutting-edge developments for image analysis  
51 with deep learning are still not used by a large portion of the biomedical imaging  
52 community.

53 To facilitate sharing, increase reproducibility and enable quicker insights into  
54 biology we employ a set of innovative complementary strategies: (1) we recently  
55 released a deep neural network platform, CDeep3M<sup>4</sup>, which circumvents installation  
56 issues and hardware requirements for end-users. We now provide a docker container  
57 of CDeep3M2 as well as a Google Colab installer with GUI (2) we are hosting  
58 CDeep3M pre-trained models in a public database (modelzoo), on cellimagelibrary.org  
59 (CIL) that also hosts relevant large microscopy datasets<sup>5</sup> and (3) we are now releasing  
60 an online CDeep3M-Preview feature, offering instantaneous testing of any trained  
61 neural network that is hosted on the CIL database. This allows users to 'test drive'

62 CDeep3M models within minutes on either their own data or on any region of interest  
63 on a large number of publicly hosted imaging data to determine if a trained model of  
64 interest performs well for their purpose and/or dataset (**Figure 1a-g, Supplementary**  
65 **Figure 1a-b**). All results are displayed through a web interface, accessible to download  
66 and can be shared with a link (**Figure 1e-g, Supplementary Figure 1c**). Users are  
67 then guided through different options how to run the same model on a larger scale or  
68 re-train the model with their own data using one of our distributions (**Figure 1h**). At the  
69 same time the CDeep3M model uploader further provides users with a way to share  
70 their trained models with the community in the modelzoo in a common place in a fully  
71 functional and testable state (**Figure 2a**).

72 Data processing with state-of-the-art deep neural networks requires high-end  
73 hardware with GPUs with sufficient vRAM. Online processing using deep neural  
74 networks for many users, as provided by CDeep3M-Preview, is limited by hardware  
75 availability equipped with high-end GPUs. We therefore implemented a scheduling  
76 system outsourcing the processing of the preview to the infrastructure of the Pacific  
77 Research Pipeline (PRP), a decentralized computing cluster with GPUs and storage  
78 nodes. The PRP cluster is managed by Kubernetes, using containerized applications  
79 to rapidly deploy computing jobs to available hardware. Our installation for the  
80 CDeep3M-Preview is containerized as a Docker image on the PRP cluster, and is  
81 streamed to available nodes allowing for near instantaneous start-up times (within  
82 seconds). The imaging data and pre-trained models are sent from CIL and the  
83 commands to initiate segmentation and the subsequent overlay with the segmentation  
84 is submitted. Using a next-generation decentralized computer cluster, rather than  
85 running the backend processing on workstation/s, provides scalability at times of high  
86 demand. In practice, this means that the end users can test whether a trained model  
87 performs on their dataset in less than 5min total, without programming knowledge and  
88 without any hardware requirements (**Figure 1**).

89 Once the user has identified a pretrained CDeep3M model and tested settings  
90 which perform well for a dataset of interest (**Figure 1e**), several routes are made  
91 available that provide quick implementations for applying the pre-trained network and  
92 the settings on the complete large-scale dataset. To this end we maintain several  
93 preconfigured installers for the use on local hardware, on supercomputer clusters or  
94 on cloud providers. Following pre-configured CDeep3M installers are provided: (i)  
95 Docker container (ii) Singularity recipe (iii) AWS cloudformation template (iv) Colab

96 Notebook (**Figure 1h**). Detailed descriptions for configurations of each of those  
 97 solutions are available with the links provided. Without much effort or the obstacle of  
 98 requiring their own GPUs or funding for high-performance hardware the users can now  
 99 also take advantage of the free GPUs provided Google Colab, with the CDeep3M-  
 100 colab installer and graphical user interface (**Supplementary Figure 2**).

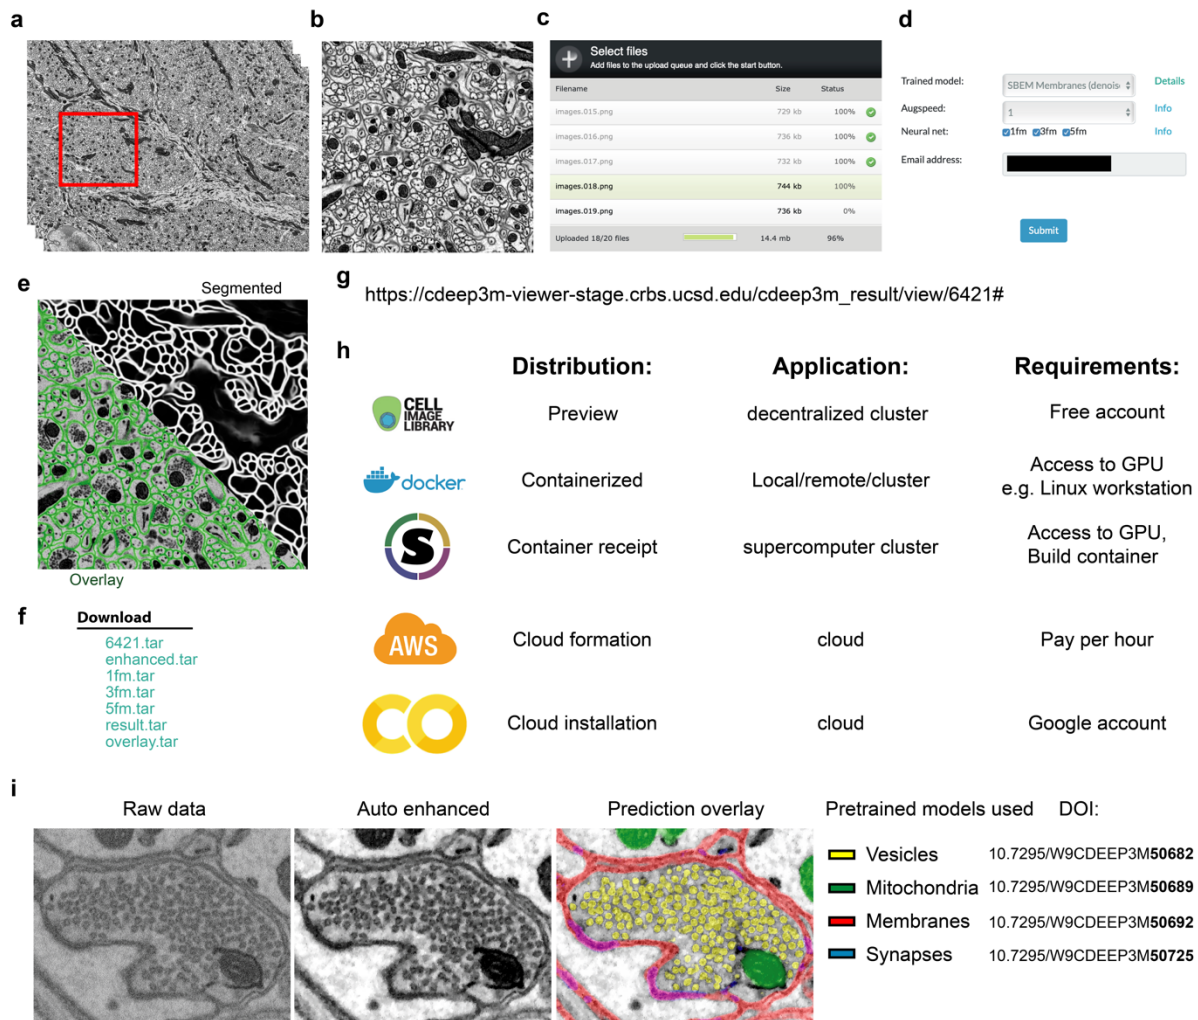

101  
 102 **Figure 1. Application of CDeep3M, using the preview function.** (a-b) Selection of a region of interest  
 103 (ROI) from a large dataset to run CDeep3M-Preview. (c) Upload ROI data through web interface  
 104 (<https://cdeep3m-stage.crbs.ucsd.edu/cdeep3m>). (d) Chose trained model from CDeep3M modelzoo  
 105 and select parameters to perform preview. (e) Results are accessible through a web interface (here  
 106 shown segmented and overlay) and (f) data is accessible for download. (g) Through the web interface  
 107 the link can easily be shared with collaborators. (h) CDeep3M is available in multiple distributions to  
 108 facilitate access for many groups, for quick entry points (CDeep3M-Preview, Docker, AWS, Colab),  
 109 small scale tests (Preview, Colab) as well as large scale data science projects (Docker, Singularity,  
 110 AWS). The end-user can then either apply the trained model to the large dataset or re-train the model  
 111 with specific training data through one of those distributions. (i) Multiple pre-trained models are available  
 112 on the CDeep3M-modelzoo and were combined in this example (without re-training the network for this

113 dataset) to segment the cellular constituents of synapses. Auto-enhancement is performed in  
114 CDeep3M2 providing generalizable models.

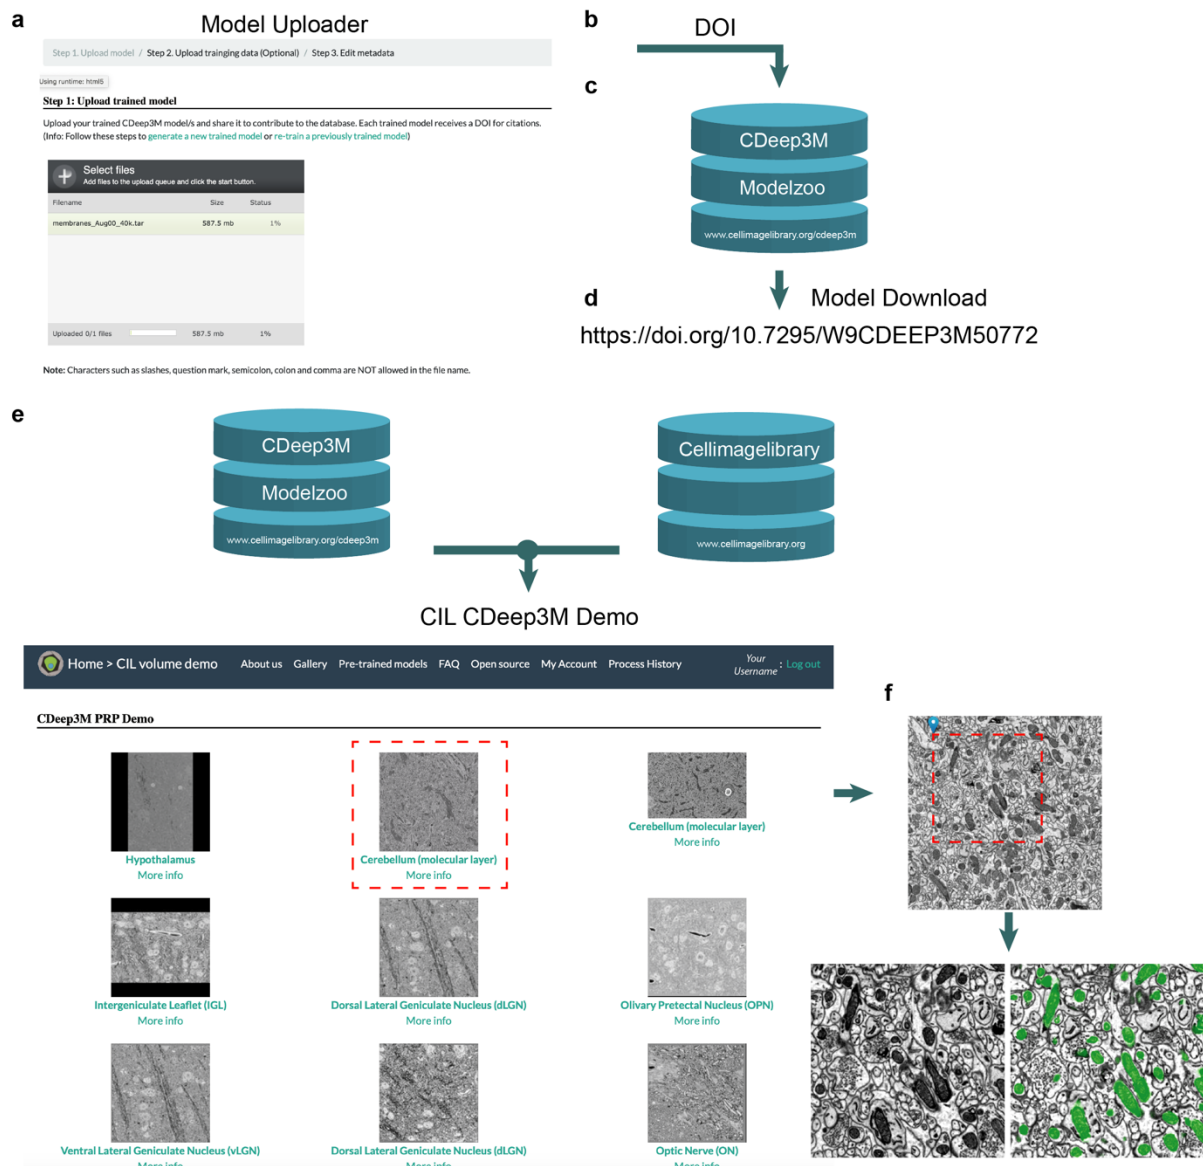

115  
116 **Figure 2. CDeep3M model uploader, database and demo function.** (a) Community contributions to  
117 the CDeep3M-modelzoo are facilitated through a web interface to upload and add metainformation to  
118 trained models. (b) Each trained model receives a citable DOI and (c) is added to the CDeep3M  
119 database, and becomes therefore accessible for the Preview function and (d) can be easily downloaded.  
120 (e) The cellimagelibrary hosts many large-scale imaging datasets to which any of the trained networks  
121 in the modelzoo can now be applied through the CDeep3M-demo function in an image browser. (f)  
122 Example using a broadly trained CDeep3M model on a dataset for which it was no trained (before any  
123 transfer learning is applied). Results can be easily shared through using the specific job ID and the web  
124 interface. Results from (f) are at: [https://cdeep3m-viewer.crbs.ucsd.edu/cdeep3m\\_result/view/6447](https://cdeep3m-viewer.crbs.ucsd.edu/cdeep3m_result/view/6447)

125

126 It is advantageous to co-host trained models and imaging data on the same  
127 platform and maximize cross-linking between the two and facilitate testing across  
128 several large datasets for generalizability. With the new extensions to the CDeep3M-

129 Modelzoo the users can upload their trained models to the CIL repository (**Figure 2a-**  
130 **d**), in order to share them or to apply them through the preview function on one of the  
131 imaging datasets. In addition, metadata about the available trained models is stored in  
132 the database, such as the targeted cell component, staining procedures, imaging  
133 modality and voxel dimensions. When releasing a trained model on the CIL database  
134 to the public, it will generate a citable Digital Object Identifier (DOI) (**Figure 2b, 2d**).  
135 The DOI is a persistent identifier used to identify objects uniquely, standardized by the  
136 International Organization for Standardization (ISO). To help other groups unlock  
137 valuable large scale data we are providing the CDeep3M-Demo, facilitating to test pre-  
138 trained models on areas of interest on the large scale datasets available on  
139 <http://cellimagelibrary.org/> (CIL; **Figure 2e**). We co-host trained CDeep3M models on  
140 the CIL providing us with the infrastructure already in place for data storage, metadata  
141 organization and large-scale image visualization. CIL is open-source software  
142 providing storage and user interfaces to deliver a publicly searchable database of  
143 microscopy images and metadata to facilitate data sharing and reuse. The CIL data  
144 input form allows end-users to submit images to the CIL data repository and annotate  
145 the images with the ontology markup.

146  
147 Together with the online preview function we release an upgrade to CDeep3M2,  
148 which provides additional functionalities and reduced runtimes. The new version of  
149 CDeep3M is backwards compatible, so that all previously trained models can still be  
150 applied and used for transfer learning with the new release. Importantly, we  
151 incorporated enhanced image augmentation strategies, that can easily be configured,  
152 to facilitate the training of more broadly tuned models. In the enhanced training  
153 augmentation pipeline, the images are first processed through the sixteen rotations  
154 and inversions (x/y and z) before each stack will go through a set of additional  
155 secondary and/or tertiary augmentations. The augmentations are performed as  
156 follows: primary augmentations consisting of rotations and inversions (x: left/right, y:  
157 top/down, z: forward/reverse) are always performed, secondary augmentations  
158 consisting of image filters (contrasting, sharpening, blurring, total variation denoising,  
159 introduction of uniform noise, histogram equalization, skewing, elastic distortion; and  
160 tertiary augmentations, resizing the images. Secondary and tertiary augmentation  
161 strengths are determined by the user with a scaling factor between 0 (no additional  
162 augmentation) and 10 (strong augmentation). The combination of augmentation

163 strength can be customized for each dataset depending on the purpose of the training  
164 (fine tuning of model for one individual dataset or broad training for generalizable  
165 model). Furthermore, users can now easily provide multiple training datasets that will  
166 be used during training, which facilitates generating broadly applicable trained  
167 networks.

168 Applying the CDeep3M-Preview and Demo functions on the cellimagelibrary  
169 serves us as an extreme test case scenario at unprecedented scale to test and improve  
170 how well a trained deep neural network performs on previously unseen data  
171 (generalizability). The available datasets are stored at various imaging conditions  
172 (pixel- and voxelsize), ranging from 8bit unsigned integer to 32bit signed integer, with  
173 different levels of noise, staining intensities and imaging conditions, acquired from  
174 different tissue types. These constraints are very typical for different biological sample  
175 preparation and imaging. Rather than performing training for each individual dataset,  
176 we focused on training and providing more generalizing models, and stabilize their  
177 performance through improved image pre-processing, which will reduce the  
178 requirements to re-train the models. Mainly we automatized the following steps: image  
179 conversion to 8bit, with simultaneous clipping of outlier pixels, readjustment of contrast  
180 and a total variation denoising (**Figure 1i**). Overall, we note that these implementations  
181 improved the generalizability of trained models making them broadly applicable to  
182 many more datasets, since this reduces most of the extreme variations in signal-to-  
183 noise levels and contrast between different SBEM datasets.

184 Altogether, the CDeep3M-Preview and new set of tools provided here gives  
185 biomedical researchers immediate access to experiment with AI for image  
186 segmentation and the ability to test different trained models near-instantaneously. A  
187 similar quick entry approach has been taken recently with DeepCell, which allows  
188 users to track cells in their own live cell imaging data with deep learning<sup>6</sup>. On the  
189 CDeep3M modelzoo a broad range of pre-trained models, trained on segmentation  
190 tasks for electron microscopy, X-ray microCT and light microscopy data are readily  
191 available. Furthermore, by taking advantage of an emerging cyberinfrastructure of  
192 decentralized compute cluster, the preview is scalable to account for the high demand  
193 of many users. This approach can serve as an entry point for community members  
194 with no experience in deep or machine learning to become familiar with the technology  
195 and experiment with the effect of different parameter settings and will contribute to  
196 democratize deep learning in the bioimaging community while allowing them to scale

197 their use case afterwards quickly to extremely large datasets through the CDeep3M  
198 built in processing pipelines.

199

## 200 **References**

201 1. Moen, E. *et al.* Deep learning for cellular image analysis. *Nature Methods* **16**, 1233–  
202 1246 (2019).

203 2. Falk, T. *et al.* U-Net: deep learning for cell counting, detection, and morphometry.  
204 *Nature Methods* **16**, 67–70 (2019).

205 3. McQuin, C. *et al.* CellProfiler 3.0: Next-generation image processing for biology.  
206 *PLOS Biology* **16**, e2005970 (2018).

207 4. Haberl, M. G. *et al.* CDeep3M—Plug-and-Play cloud-based deep learning for image  
208 segmentation. *Nature Methods* **15**, 677–680 (2018).

209 5. Orloff, D. N., Iwasa, J. H., Martone, M. E., Ellisman, M. H. & Kane, C. M. The cell:  
210 an image library-CCDB: a curated repository of microscopy data. *Nucleic Acids*  
211 *Research* **41**, D1241–D1250 (2012).

212 6. Moen, E. *et al.* Accurate cell tracking and lineage construction in live-cell imaging  
213 experiments with deep learning. *bioRxiv* 803205 (2019) doi:10.1101/803205.

214

## 215 **Acknowledgements**

216 This research was funded by grants from the National Institutes of Health under award  
217 numbers 3R01GM082949, 3P41GM103412, 1RF1MH120685, 1R01AG065549 and  
218 5R01DA038896. The CDeep3M-Preview and Demo are using PRP/Chase-CI, which  
219 is supported by its members institutions and the United States National Science  
220 Foundation through the NSF awards CNS-1456638, CNS-1730158, ACI-1540112,  
221 ACI-1541349, and OAC-1826967.

222

## 223 **Author contributions**

224 M.G.H. performed computational experiments. M.G.H. and J.J. wrote CDeep3M  
225 upgrade. W.W. implemented CDeep3M-Preview and CDeep3M-Demo interface on



226 CIL and model zoo uploader and database. S.P. implemented preview backend  
227 scheduler. A.B. maintains singularity recipe and AWS cloud formation template.  
228 M.G.H. wrote colab implementation with GUI. M.G.H. and M.M trained models hosted  
229 on modelzoo. D.B. acquired SBEM data. M.G.H., S.T.P. and M.H.E. supervised  
230 project. M.G.H. wrote manuscript with input from all authors.

231

## 232 **Competing interests**

233 The authors declare no competing interests.

234

## 235 **Methods**

236 **CIL backend system.** Under the CIL system, the metadata will be converted into  
237 JSON format and stored in a NoSQL datastore. The CIL utilizes Elasticsearch as its  
238 JSON search engine since it provides a distributed, multitenant-capable full-text  
239 search engine with an HTTP web interface. When JSON data is imported into the  
240 Elasticsearch datastore, all of the data fields are automatically indexed and  
241 immediately searchable using the built-in web-service. These built-in functions in  
242 Elasticsearch are crucial for software development because it saves tremendous  
243 development time otherwise spent building data models and backend services.

244

245 **Backend operations Scheduling system.** At the core of the scheduling system for  
246 the CDeep3M-Preview and Demo functions is the beanstalkd queue  
247 (<https://beanstalkd.github.io/>). Beanstalkd is a robust multichannel FIFO queuing  
248 system. A single queue (or tube) contains the jobs in the order they are submitted.  
249 Each job consists of the UID of the requestor, a description of the job to be run and its  
250 arguments, and an authentication token with a timestamp. A job can be in one of 4  
251 states, ready, reserved, delayed, or buried. A custom written Perl based web API  
252 (stalker\_web) is used as an abstraction layer for the interaction with beanstalkd. A job  
253 is submitted to the system via a client; the client does a few basic sanity checks against  
254 the submitted job, secures a token and submits the job to the queue via stalker\_web  
255 and if the submission is successful is returned the job id in the tube. Once in the tube  
256 the job is in the ready state.

257 On the processing side there is a worker that periodically checks the tube for  
258 ready jobs, if a job is found, it's parsed and if the worker has the capabilities needed  
259 to run the job it verifies the token then reserves the job and then places it in the delayed

260 state for an amount of time equal to the expected runtime (ERT). This removes the job  
261 from the ready state so no other workers will see the job. Since these are typically  
262 longer running jobs and are designed to run on geographically disparate hardware in  
263 an ad libitum fashion the delay is set to remove the need for the constant  
264 communication between worker and queue required by the reserved state.

265 The worker then sets the environment, downloads any data or models it needs,  
266 and proceeds to process the job as the UID of the submitter, collecting the output of  
267 the commands into a log. A separate watchdog process is started that will check every  
268 90% of ERT if the worker process is still running and if it is, try to reset the delay on  
269 that job to ERT until successful or the parent process exits. Once the commands finish,  
270 the worker deletes the job from the queue and the log is published to a separate tube  
271 named with the job id of the original job.

272 The worker sends the output data back to the requestor via an API call. If the  
273 worker should die or communication between the worker and the queue goes down  
274 the delay time will eventually run out and the job will go back into ready state for  
275 another worker to pick up and process.

276

277 **PRP platform.** CDeep3M-preview is running as a Kubernetes Pod on the Pacific  
278 Research Platform (PRP) and configured to use gpu-pods equipped with GPUs with  
279 least 11GB vRAM. PRP is spanning over 20 universities and institutions, all  
280 connected by dedicated optical light-paths at speeds of 10-100gb/s. A list of currently  
281 available PRP resources can be found at: [https://ucsd-  
282 \[prp.gitlab.io/userdocs/running/gpu-pods/\]\(https://ucsd-prp.gitlab.io/userdocs/running/gpu-pods/\).](https://ucsd-prp.gitlab.io/userdocs/running/gpu-pods/)

283

284 **CDeep3M2 data augmentations.** Data augmentations are used to avoid overfitting to  
285 training data and intended to increase generalizability of trained models. To facilitate  
286 regulating which data augmentation strategies are used we chose to separate  
287 augmentation strategies into following three categories:

288 *Primary augmentations* refer to augmentations that only change the image  
289 orientations, such as data rotations and flipping in x, y and z directions. Since those  
290 leave the data unaltered they are always performed, on each training dataset, to  
291 generate 16 variations of the same data.

292 *Secondary augmentations* are data augmentations which alter the noise level, the  
293 brightness or the contrast of the images. Secondary augmentations are performed if a

294 setting between 1 (weak) to 10 (strong) is chosen. Following operations are used in  
295 secondary augmentations: increase and lowering of the image contrast; sharpening  
296 and gaussian blurring of the image stack; total variation using the Chambolle and/or  
297 Bregman filter to denoise the image; adding of random binary gaussian noise;  
298 normalization of the image by performing histogram equalization; random skewing of  
299 the image stack to four different directions (upper left, upper right, lower left, lower  
300 right) while maintaining the image's aspect ratio; elastic distortions across the image  
301 stack in which the first and the last images of the stack are distorted by a randomly  
302 generated gaussian vector field while the images in between are distorted by the  
303 interpolated field in between the two.

304 *Tertiary Augmentation* are performed if a setting between 1 (weak) to 10 (strong) is  
305 chosen. During the tertiary augmentations images are resized, according to a strength  
306 selected by the end user (values 1-10). Data is resized using upscaling alternating with  
307 downscaling, to broaden the networks capabilities to recognize the same object at a  
308 different pixelsize.

309

## 310 **Code availability**

311 All code is open access. The CDeep3M2 Docker container can be pulled directly from  
312 Docker-Hub at <https://hub.docker.com/r/ncmir/cdeep3m> or simply running 'docker pull  
313 ncmir/cdeep3m:latest'. The Google Colab Jupyter Notebooks with graphical user-  
314 interface (GUI) are available on GitHub at [https://github.com/haberlmatt/cdeep3m-](https://github.com/haberlmatt/cdeep3m-colab)  
315 [colab](https://github.com/haberlmatt/cdeep3m-colab). The CDeep3M2 AWS cloudformation template is available [here](#). CDeep3M2  
316 source code is available on GitHub <https://github.com/CRBS/cdeep3m2>. The  
317 singularity image is available at: <http://cellimagelibrary.org/cdeep3m/singularity>.
